# Supplementary material for: Osteopontin binds ICOSL promoting tumor metastasis
Source: PubMed Central journal article supplement (PMC7588454; doi:10.1038/s42003-020-01333-1), 2020-10-26
Supplement: 42003_2020_1333_MOESM3_ESM.pdf [file 42003_2020_1333_MOESM3_ESM.pdf]

## **Description of additional supplementary file**

**File name:** Supplementary Data 1

**Description:** Source data underlying the graphs presented in the main and supplementary figures.
