# Supplementary material for: Osteopontin binds ICOSL promoting tumor metastasis
Source: PubMed Central journal article supplement (PMC7588454; doi:10.1038/s42003-020-01333-1), 2020-10-26
Supplement: 42003_2020_1333_MOESM5_ESM.pdf [file 42003_2020_1333_MOESM5_ESM.pdf]

## Reporting Summary

Nature Research wishes to improve the reproducibility of the work that we publish. This form provides structure for consistency and transparency in reporting. For further information on Nature Research policies, see [Authors & Referees](#) and the [Editorial Policy Checklist](#).

### Statistics

For all statistical analyses, confirm that the following items are present in the figure legend, table legend, main text, or Methods section.

n/a Confirmed

- |                                     |                                     |                                                                                                                                                                                                                                                            |
|-------------------------------------|-------------------------------------|------------------------------------------------------------------------------------------------------------------------------------------------------------------------------------------------------------------------------------------------------------|
| <input type="checkbox"/>            | <input checked="" type="checkbox"/> | The exact sample size ( $n$ ) for each experimental group/condition, given as a discrete number and unit of measurement                                                                                                                                    |
| <input type="checkbox"/>            | <input checked="" type="checkbox"/> | A statement on whether measurements were taken from distinct samples or whether the same sample was measured repeatedly                                                                                                                                    |
| <input type="checkbox"/>            | <input checked="" type="checkbox"/> | The statistical test(s) used AND whether they are one- or two-sided<br><i>Only common tests should be described solely by name; describe more complex techniques in the Methods section.</i>                                                               |
| <input type="checkbox"/>            | <input checked="" type="checkbox"/> | A description of all covariates tested                                                                                                                                                                                                                     |
| <input type="checkbox"/>            | <input checked="" type="checkbox"/> | A description of any assumptions or corrections, such as tests of normality and adjustment for multiple comparisons                                                                                                                                        |
| <input type="checkbox"/>            | <input checked="" type="checkbox"/> | A full description of the statistical parameters including central tendency (e.g. means) or other basic estimates (e.g. regression coefficient) AND variation (e.g. standard deviation) or associated estimates of uncertainty (e.g. confidence intervals) |
| <input checked="" type="checkbox"/> | <input type="checkbox"/>            | For null hypothesis testing, the test statistic (e.g. $F$ , $t$ , $r$ ) with confidence intervals, effect sizes, degrees of freedom and $P$ value noted<br><i>Give <math>P</math> values as exact values whenever suitable.</i>                            |
| <input checked="" type="checkbox"/> | <input type="checkbox"/>            | For Bayesian analysis, information on the choice of priors and Markov chain Monte Carlo settings                                                                                                                                                           |
| <input checked="" type="checkbox"/> | <input type="checkbox"/>            | For hierarchical and complex designs, identification of the appropriate level for tests and full reporting of outcomes                                                                                                                                     |
| <input checked="" type="checkbox"/> | <input type="checkbox"/>            | Estimates of effect sizes (e.g. Cohen's $d$ , Pearson's $r$ ), indicating how they were calculated                                                                                                                                                         |

*Our web collection on [statistics for biologists](#) contains articles on many of the points above.*

### Software and code

Policy information about [availability of computer code](#)

Data collection

no softwares were used for data collection

Data analysis

The following software were used for data analysis:  
 GraphPad InStat software (GraphPad Software) was used to statistical analysis,  
 ImageJ software was used to count the tumor colonies and to quantify the Meca-32 positive structures.  
 Batch-Tag, MS-Bridge and MS-Product tools within the Protein Prospector package were used for mass spectrometry analysis in order to identify cross-linked peptide.  
 Peptides after cross-linking experiment were identified using MASCOT software.

For manuscripts utilizing custom algorithms or software that are central to the research but not yet described in published literature, software must be made available to editors/reviewers. We strongly encourage code deposition in a community repository (e.g. GitHub). See the Nature Research [guidelines for submitting code & software](#) for further information.

### Data

Policy information about [availability of data](#)

All manuscripts must include a [data availability statement](#). This statement should provide the following information, where applicable:

- Accession codes, unique identifiers, or web links for publicly available datasets
- A list of figures that have associated raw data
- A description of any restrictions on data availability

The authors declare that the data supporting the findings of this study are available within the article, its supplementary information, and upon request.

## Field-specific reporting

Please select the one below that is the best fit for your research. If you are not sure, read the appropriate sections before making your selection.

- Life sciences     Behavioural & social sciences     Ecological, evolutionary & environmental sciences

For a reference copy of the document with all sections, see [nature.com/documents/nr-reporting-summary-flat.pdf](https://nature.com/documents/nr-reporting-summary-flat.pdf)

## Life sciences study design

All studies must disclose on these points even when the disclosure is negative.

|                 |                                                                                                                                                                 |
|-----------------|-----------------------------------------------------------------------------------------------------------------------------------------------------------------|
| Sample size     | Sample size was based on our preliminary results and, for untransfected 4T1 cells, previous published studies. We used G*power for an alpha=0.05 and beta =0.8. |
| Data exclusions | No data were excluded from the analysis                                                                                                                         |
| Replication     | All attempts at replication were successful.                                                                                                                    |
| Randomization   | For the animal study, all animals within the two experimental groups were delivered within the same week and derived from the same breeding cage.               |
| Blinding        | For the animal study the investigator who measured tumor growth and metastasis count was blind to the assignment of each experimental group                     |

## Reporting for specific materials, systems and methods

We require information from authors about some types of materials, experimental systems and methods used in many studies. Here, indicate whether each material, system or method listed is relevant to your study. If you are not sure if a list item applies to your research, read the appropriate section before selecting a response.

### Materials & experimental systems

- |                                     |                                                                 |
|-------------------------------------|-----------------------------------------------------------------|
| n/a                                 | Involved in the study                                           |
| <input type="checkbox"/>            | <input checked="" type="checkbox"/> Antibodies                  |
| <input type="checkbox"/>            | <input checked="" type="checkbox"/> Eukaryotic cell lines       |
| <input checked="" type="checkbox"/> | <input type="checkbox"/> Palaeontology                          |
| <input type="checkbox"/>            | <input checked="" type="checkbox"/> Animals and other organisms |
| <input checked="" type="checkbox"/> | <input type="checkbox"/> Human research participants            |
| <input checked="" type="checkbox"/> | <input type="checkbox"/> Clinical data                          |

### Methods

- |                                     |                                                    |
|-------------------------------------|----------------------------------------------------|
| n/a                                 | Involved in the study                              |
| <input checked="" type="checkbox"/> | <input type="checkbox"/> ChIP-seq                  |
| <input type="checkbox"/>            | <input checked="" type="checkbox"/> Flow cytometry |
| <input checked="" type="checkbox"/> | <input type="checkbox"/> MRI-based neuroimaging    |

## Antibodies

### Antibodies used

The following antibodies were used in this study:

1. Anti-human ICOSL-PE conjugated (Bio-technie, Minneapolis, Minnesota, USA, catalog # FAB165P, clone # 136726, lot AALC0416121)
2. Anti-mouse ICOSL (Life Technologies, Carlsbad, California, USA, catalog # PA5-47161, lot UJ28576)
3. Anti-human HRP conjugated (Dako, Santa Clara, California, USA, catalog # P0214, lot 0005209)
4. Anti-human OPN biotinylated (Bio-technie, Minneapolis, Minnesota, USA, catalog # BAF1433, lot JCY1117031)
5. Anti-human OPN (Bio-technie system, Minneapolis, Minnesota, USA, catalog # AF1433, lot IWX1617021).
6. Anti-mouse OPN for immunofluorescence (Abcam, Cambridge, UK, catalog # ab8448, lot GR3271)
7. Anti-mouse panendothelial (BD, Pharmingen, catalog # 550563, clone Meca-32, lot 5345978)
8. Anti-goat Alexa 555 conjugated (Life technologies, Carlsbad, California, USA, catalog # A21422, lot 1818686)
9. Anti-rat Alexa 488 conjugated (Life technologies, Carlsbad, California, USA, catalog # R37118, lot 1900239)
10. Anti-rabbit Alexa 488 conjugated (Life technologies, Carlsbad, California, USA, catalog # A21206, lot 1927937)

### Validation

1. It Detects human B7-H2 in direct ELISAs. In direct ELISAs and Western blots, no cross-reactivity with recombinant human (rh) B7-1, rhB7-2, rhB7-H1, rhB7-H3, or recombinant mouse B7-H2 is observed. It has flow cytometry applications followed by this citation:  
B7h triggering inhibits the migration of tumor cell lines. Authors: Dianzani C, Minelli R, Gigliotti C, Occhipinti S, Giovarelli M, Conti L, Boggio E, Shivakumar Y, Baldanzi G, Malacarne V, Orilieri E, Cappellano G, Fantozzi R, Sblattero D, Yagi J, Rojo J, Chiocchetti A, Dianzani U. J Immunol, 2014;192(10):4921-31.
2. In direct ELISAs and Western blots, it has less than 2% cross-reactivity with recombinant human (rh) B7-H2, recombinant mouse (rm) B7-1, rhB7-1, and rmB7-2 is observed. The antibody ID in the antibody register is AB\_2577162. It has immunohistochemistry, immunofluorescence and western blots applications.

3. The polyclonal rabbit anti-human IgG/HRP antibody is used to detect human IgG in ELISA assay and immunoblotting, it has the following citations: 1- Vittinghus E. Preanalytical handling of stored urine samples, and measurement of  $\beta$ 2-microglobulin, orosomucoid, albumin, transferrin and immunoglobulin G in urine by enzyme-linked immunosorbent assays (ELISA). Scand J Clin Lab Invest 1990;50:843-9. 2- Condorelli F, Scalia G, Stivala A, Gallo R, Marino A, Battaglini CM, et al. Detection of immunoglobulin to measles virus, rubella virus, and mumps virus in serum samples and in microquantities of whole blood dried on filter paper. J Virol methods 1994;49:25-36.
4. It Detects human Osteopontin/OPN in ELISAs and Western blots. In sandwich ELISAs, less than 0.2% cross-reactivity with recombinant mouse (rm) Osteopontin and bovine Osteopontin is observed. It has the following applications: western blot, immunohistochemistry and ELISA assay followed by these citations: 1- A multiplex immunoassay of serum biomarkers for the detection of uveal melanoma Authors: J Song, SL Merbs, LJ Sokoll, DW Chan, Z Zhang Clin Proteomics, 2019;16(0):10. 2- Gene expression signatures for tumor progression, tumor subtype, and tumor thickness in laser-microdissected melanoma tissues. Authors: Jaeger J, Koczan D, Thiesen HJ, Ibrahim SM, Gross G, Spang R, Kunz M Clin. Cancer Res., 2007;13(3):806-15.
5. It Detects human Osteopontin/OPN in direct ELISAs and Western blots. In direct ELISAs, less than 10% cross-reactivity with recombinant rat Osteopontin and recombinant mouse OPN is observed. It is used to recognize human OPN in ELISA assay, immunohistochemistry and also to neutralize OPN in functional experiments. The antibody it is cited from over 15 sources.
6. It is produced using the synthetic peptide corresponding to Human Osteopontin aa 170-183 conjugated to keyhole limpet haemocyanin. Sequence: CKSKKFRRPDIQYPD. Its applications are immunohistochemistry, immunofluorescence and western blots. It is cited from over 150 sources.
7. It reacts only with mouse protein. It is recommended to test for immunohistochemical staining and flow cytometry assays. It has up to 5 references.
8. The sensitivity and specificity of each lot is confirmed using ELISA. Minimal cross-reactivity with mouse, rat, human, bovine, guinea pig, and donkey IgG are observed. It is recommended for immunohistochemistry and immunofluorescence assays.
9. This antibody shows minimum cross-reactivity to bovine, chicken, goat, guinea pig, hamster, horse, human, mouse, rat, and sheep serum proteins. It has immunohistochemistry, immunofluorescence and flow cytometry applications, it is cited from over 10 sources.
10. The sensitivity and specificity of each lot is confirmed using ELISA. Minimal cross-reactivity with mouse, rat, human, bovine, guinea pig and donkey IgG are observed. It can be used in flow cytometry, immunohistochemistry and immunofluorescence assays. It is cited from over 5 sources.

## Eukaryotic cell lines

Policy information about [cell lines](#)

|                                                                   |                                                                                               |
|-------------------------------------------------------------------|-----------------------------------------------------------------------------------------------|
| Cell line source(s)                                               | All cell lines used in this study were purchased from ATCC                                    |
| Authentication                                                    | All cell lines used in this study were not authenticated                                      |
| Mycoplasma contamination                                          | All cell lines used in this study were tested and found negative for Mycoplasma contamination |
| Commonly misidentified lines (See <a href="#">ICLAC</a> register) | No commonly misidentified cell lines were used                                                |

## Animals and other organisms

Policy information about [studies involving animals](#); [ARRIVE guidelines](#) recommended for reporting animal research

|                         |                                                                                                                                                                                                                                                       |
|-------------------------|-------------------------------------------------------------------------------------------------------------------------------------------------------------------------------------------------------------------------------------------------------|
| Laboratory animals      | Eight-10 weeks old female C57BL/6J, B6.129S6(Cg)-Spp1tm1Blh/J and BALB/cOlaHsd mice<br>Ten-12 weeks old female MRL/MpJ-Faspr/J mice                                                                                                                   |
| Wild animals            | This study does not involve wild animals                                                                                                                                                                                                              |
| Field-collected samples | This study does not involve sample collected from field                                                                                                                                                                                               |
| Ethics oversight        | All experimental procedures were conducted, following European guidelines, in accordance with both the University Ethical Committee and the National Institutes of Health Ministry and Care Committee, both of which approved the protocol(DB064.42). |

Note that full information on the approval of the study protocol must also be provided in the manuscript.

## Flow Cytometry

### Plots

Confirm that:

- The axis labels state the marker and fluorochrome used (e.g. CD4-FITC).
- The axis scales are clearly visible. Include numbers along axes only for bottom left plot of group (a 'group' is an analysis of identical markers).
- All plots are contour plots with outliers or pseudocolor plots.
- A numerical value for number of cells or percentage (with statistics) is provided.

## Methodology

Sample preparation

Hela, A2058, M14, JR8 and PCF-2 cells were detached and washed twice with PBS + 1% FBS, 2.5 ug of anti-ICOSL-PE or anti-His-PE were used for immunostaining.

Instrument

FACScalibur

Software

Cell quest PRO

Cell population abundance

no sorting experiments were performed

Gating strategy

Hela, A2058, M14, JR8 and PCF-2 cells were identified in FSC/SSC dot plots, then, the PE fluorescence was evaluated.

Tick this box to confirm that a figure exemplifying the gating strategy is provided in the Supplementary Information.
